# Supplementary material for: Methylmalonic acid, vitamin B12, renal function, and risk of all-cause mortality in the general population: results from the prospective Lifelines-MINUTHE study
Source: Springer Nature journal article supplement (doi:10.1186/s12916-020-01853-x), 2020-12-01
Supplement: MOESM1 [file 18673344]

**Additional file 1.** Univariable and multivariable linear regression analyses for log<sub>2</sub> MMA after exclusion of individuals that used multivitamin or vitamin B supplements (n = 1,360).

|                                                                  | Univariable |         | Multivariable<br>Model 1 |         | Multivariable<br>Model 2 |         |
|------------------------------------------------------------------|-------------|---------|--------------------------|---------|--------------------------|---------|
|                                                                  | Std b       | P-value | Std b                    | P-value | Std b                    | P-value |
| Log <sub>2</sub> vitamin B <sub>12</sub> (pmol/L)                | -0.412      | <0.001  | -0.424                   | <0.001  | 1.510                    | 0.02    |
| Log <sub>2</sub> eGFR (mL/min/1.73 m <sup>2</sup> )              | -0.186      | <0.001  | -0.168                   | <0.001  | 0.906                    | 0.01    |
| Log <sub>2</sub> vitamin B <sub>12</sub> x Log <sub>2</sub> eGFR | -           | -       | -                        | -       | -2.215                   | 0.004   |
| <b>Demographics</b>                                              |             |         |                          |         |                          |         |
| Male sex                                                         | 0.016       | 0.5     | -0.039                   | 0.1     | -                        | -       |
| Age (years)                                                      | 0.091       | 0.001   | 0.051                    | 0.046   | 0.038                    | 0.1     |
| High education                                                   | -0.078      | 0.004   | -                        | -       | -                        | -       |

Abbreviations: eGFR, estimated glomerular filtration rate; MMA, methylmalonic acid.

Model 1: R<sup>2</sup> = 0.21; Adjusted R<sup>2</sup> = 0.21.

Model 2: R<sup>2</sup> = 0.21; Adjusted R<sup>2</sup> = 0.21.
