# Supplementary material for: Methylmalonic acid, vitamin B12, renal function, and risk of all-cause mortality in the general population: results from the prospective Lifelines-MINUTHE study
Source: Springer Nature journal article supplement (doi:10.1186/s12916-020-01853-x), 2020-12-01
Supplement: MOESM4 [file 18673344]

**Additional file 4.** Prospective associations of log<sub>2</sub> MMA, eGFR and of interaction of log<sub>2</sub> MMA with eGFR, respectively, with all-cause mortality stratified for SES ( $n_{\text{events}} / n_{\text{total}} = 72/1,533$ ).

|                                  | <b>Model 1</b>     |                | <b>Model 2</b>     |                | <b>Model 3</b>     |                |
|----------------------------------|--------------------|----------------|--------------------|----------------|--------------------|----------------|
|                                  | <b>HR (95% CI)</b> | <b>P-value</b> | <b>HR (95% CI)</b> | <b>P-value</b> | <b>HR (95% CI)</b> | <b>P-value</b> |
| Log <sub>2</sub> MMA (nmol/L)    | 13.72 (3.96-47.50) | <0.001         | 16.35 (4.74-56.36) | <0.001         | 10.86 (3.14-37.62) | <0.001         |
| eGFR (10 mL/min/m <sup>2</sup> ) | 8.01 (2.12-30.16)  | 0.002          | 10.85 (2.85-41.28) | <0.001         | 7.20 (1.88-27.53)  | 0.004          |
| Log <sub>2</sub> MMA x eGFR      | 0.75 (0.64-0.88)   | <0.001         | 0.73 (0.63-0.86)   | <0.001         | 0.77 (0.66-0.90)   | 0.001          |

Model 1: log<sub>2</sub> MMA, eGFR, log<sub>2</sub> MMA x eGFR.

Model 2: adjusted for age and sex.

Model 3: as model 2 + smoking, alcohol intake, BMI, SBP, vitamin B12 and use of vitamin supplements.

Abbreviations: BMI, body mass index; eGFR, estimated glomerular filtration rate; SBP, systolic blood pressure; SES, socioeconomic status.
