# Supplementary material for: Methylmalonic acid, vitamin B12, renal function, and risk of all-cause mortality in the general population: results from the prospective Lifelines-MINUTHE study
Source: Springer Nature journal article supplement (doi:10.1186/s12916-020-01853-x), 2020-12-01
Supplement: MOESM5 [file 18673344]

**Additional file 5.** Interaction of  $\log_2$  MMA with eGFR and all-cause mortality after exclusion of individuals that used multivitamin or vitamin B supplements ( $n_{\text{events}} / n_{\text{total}} = 68/1,360$ ).

|                                  | <b>Model 1</b>     |                | <b>Model 2</b>     |                | <b>Model 3</b>     |                |
|----------------------------------|--------------------|----------------|--------------------|----------------|--------------------|----------------|
|                                  | <b>HR (95% CI)</b> | <b>P-value</b> | <b>HR (95% CI)</b> | <b>P-value</b> | <b>HR (95% CI)</b> | <b>P-value</b> |
| $\log_2$ MMA (nmol/L)            | 12.63 (3.54-45.03) | <0.001         | 14.50 (4.10-51.20) | <0.001         | 10.47 (2.93-37.45) | <0.001         |
| eGFR (10 mL/min/m <sup>2</sup> ) | 7.40 (1.92-28.34)  | 0.004          | 10.05 (2.60-38.90) | 0.001          | 7.27 (1.84-28.72)  | 0.005          |
| $\log_2$ MMA x eGFR              | 0.76 (0.65-0.89)   | 0.001          | 0.74 (0.63-0.87)   | <0.001         | 0.77 (0.65-0.91)   | 0.002          |

Model 1:  $\log_2$  MMA, eGFR,  $\log_2$  MMA x eGFR.

Model 2: adjusted for age and sex.

Model 3: as model 2 + SES, smoking, alcohol intake, BMI, SBP, vitamin B12 and use of vitamin supplements.

Abbreviations: BMI, body mass index; eGFR, estimated glomerular filtration rate; SBP, systolic blood pressure; SES, socioeconomic status.
