# Supplementary material for: Methylmalonic acid, vitamin B12, renal function, and risk of all-cause mortality in the general population: results from the prospective Lifelines-MINUTHE study
Source: Springer Nature journal article supplement (doi:10.1186/s12916-020-01853-x), 2020-12-01

# Risk of mortality

# Hazard Ratio

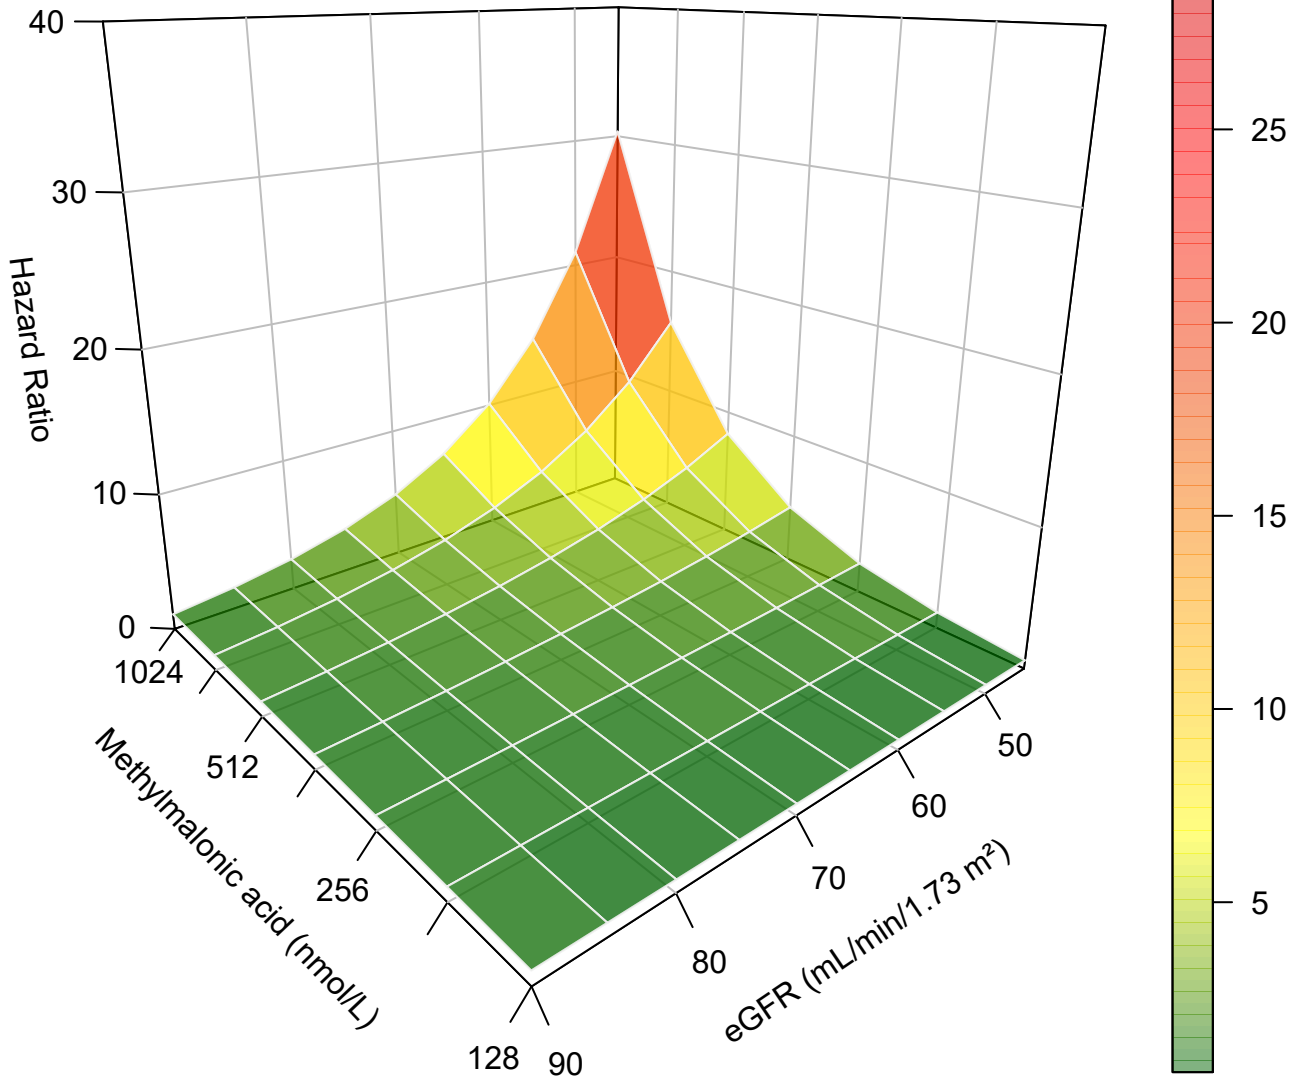

Supplement: MOESM6 [file 18673344]
